# Supplementary material for: Synthesis of sulfur/activated carbon aerogels composite with a novel homogeneous precipitation method as cathode materials for lithium–sulfur batteries
Source: Royal Society of Chemistry journal article supplement (doi:10.1039/c3ra42844c), 2013-01-01
Supplement: c3ra42844c.pdf [file c3ra42844c.pdf]

## Electronic Supplementary Information

### Synthesis of sulfur/activated carbon aerogels composite with a novel homogeneous precipitation method as cathode materials for lithium-sulfur batteries

Shaofeng Jiang<sup>a</sup>, Zhian Zhang<sup>\*a,b</sup>, Xiwen Wang<sup>a</sup>, Yaohui Qu<sup>a</sup>, Yanqing Lai<sup>a,b</sup>, Jie Li<sup>a,b</sup>

<sup>a</sup> School of Metallurgy and Environment, Central South University, Changsha 410083, China

<sup>b</sup> Engineering Research Center of Advanced Battery Materials, the Ministry of Education, Changsha 410083, China

#### Experimental

##### 1.1 Synthesis of sulfur/activated carbon aerogels composite

The carbon aerogels (TianJin, Deruifengkai, China), which were prepared by a sol–gel process, drying technique and carbonization<sup>1,2</sup>, were etched by KOH at 800 °C for 120 min using 4:1 KOH:C ratio under argon atmosphere to obtain ACAs.

The synthesis process for the S-ACAs composite is illustrated in Fig. 1.

First, 0.4 g sublimate sulfur (AR, Aladdin, China) was completely dissolved in 10 g of 17% mass fraction of ammonium sulfide solution (AR, ShangHai Shiyi, China) by stirring. Then, 0.2 g of ACAs was suspended in the above solution by adding a small amount of TX-100 (Polyethylene Glycol Octylphenol Ether, (C<sub>2</sub>H<sub>4</sub>O)<sub>n</sub>C<sub>14</sub>H<sub>22</sub>O, Fisher scientific) under ultrasonic vibrations. By heating to 95 °C, sulfur precipitated onto the surface and into the interspaces of the nano-sized ACAs. During the homogeneous precipitation processing, the sulfur particles grew to a thermodynamically favored size. Simultaneously, the carbon nanoparticles in the composite became interconnected with each other through self-assembling and finally wrapped the sulfur. After allowing the reaction mixture to stir for 2 h, the product was filtered and washed several times with deionized water, ethanol and acetone. The S-ACAs composite thus collected was dried in an air-oven at 50°C for 24 h. The sulfur content in the composite was determined by thermogravimetric analyzer (TGA, SDTQ600) at a heating rate of 5 °C /min from 20 to 500 °C with flowing air as showing in Fig. S1. The S-ACAs composites with 64.5 wt.% sulfur as confirmed by the TGA data were employed for further experiments.

##### 1.2. Material characterization

Field emission scanning electron microscopy (FESEM, Nova NanoSEM 230) and transmission electron microscopy (TEM, Tecnai G2 20ST) were applied to characterize the materials. X-ray diffraction (XRD, Rigaku3014) measurements were made with Cu K $\alpha$  radiation. Thermogravimetric analysis (TGA, SDTQ600) was conducted in determining the sulfur content in the composites. N<sub>2</sub> adsorption/ desorption measurements were performed by using Quantachrome instrument (Quabrorb SI-3MP) at 77 K.

##### 1.3. Cell assembly

The composite cathode slurry was made by mixing 70 wt.% S-ACAs composite material, 20 wt.% carbon black and 10 wt.% polyvinylidene fluoride (PVDF) binder in N-methyl-2-pyrrolidinone (NMP) solvent. Then, the slurry was spread onto aluminum foil (20 $\mu$ m), and dried at 60 °C under vacuum overnight. The sulfur contents in the S-ACAs composite cathode were about 64.5 wt.%, so the composite cathode contained 45 wt.% active materials. The pristine sulfur cathode containing 45wt.% sublimate sulfur, 45 wt.% carbon black, and 10 wt.% PVDF binder was prepared in the same way for comparison. The pristine sulfur used for comparison is the purchased sublimate sulfur (AR, Aladdin, China) which was sieved between 1~10  $\mu$ m. Coin-type (CR2025) cells were assembled in an argon-filled glove box (Universal 2440/750) in which oxygen and water contents were less than 1 ppm. The electrolyte used was 1 M bis (trifluoromethane) sulfonamide lithium salt (LiTFSI, Sigma Aldrich) in a solvent mixture of 1,3-dioxolane and 1,2-dimethoxyethane (1:1, v/v) (Acros Organics) including 0.1 M LiNO<sub>3</sub>. Lithium metal was used as counter electrode and reference electrode and Celgard 2400 was used as separator.

#### 1.4. Electrochemical characterizations

Cyclic voltammetry (CV) and electrochemical impedance spectroscopy (EIS) measurements were conducted using PARSTAT 2273 electrochemical measurement system. CV tests were performed at a scan rate of 0.1 mV s<sup>-1</sup> in the voltage range of 1.5 to 3.0 V. EIS measurements were carried out at open-circuit potential in the frequency range between 100 kHz and 10 mHz with a perturbation amplitude of 5 mV. Galvanostatic charge/discharge tests were performed in the potential range of 1.5 to 3.0 V at 25 °C by using a LAND CT2001A battery-testing instrument.

[1] N P Liu, J Shen, D Liu, *Electrochimica Acta*, 2013,**97**,271-277.

[2] Z. Z Benabithe, F C Marin. Okushi, C M Castilla, *J. Power Sources*, 2012, **219**, 80-88.

#### Supporting figure

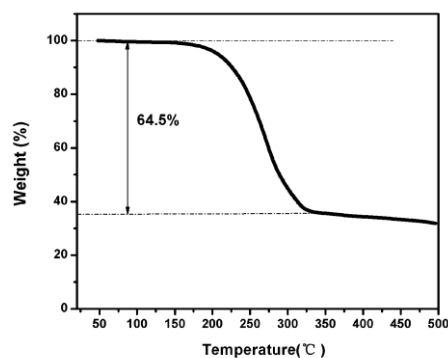

Fig. S1 TGA curve of S-ACAs composite recorded in air.

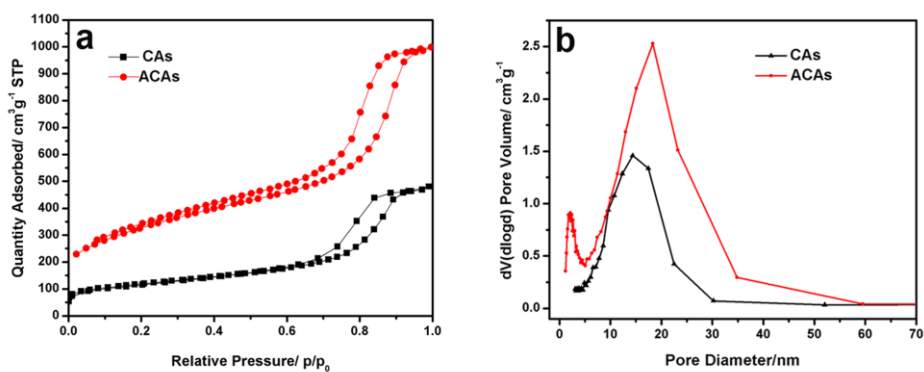

Fig. S2  $\text{N}_2$  adsorption-desorption isotherms (a) and pore size distributions (b) of CAs and ACAs.

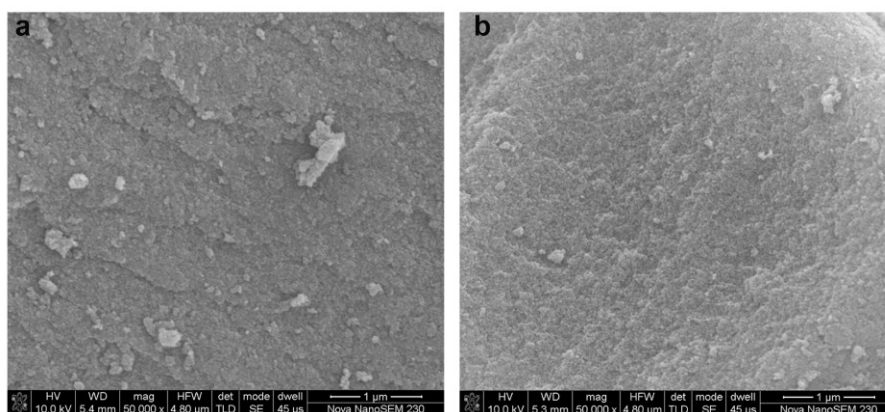

Figure. S3 High-magnification SEM images of the carbon aerogels (a) and activated carbon aerogels (b).

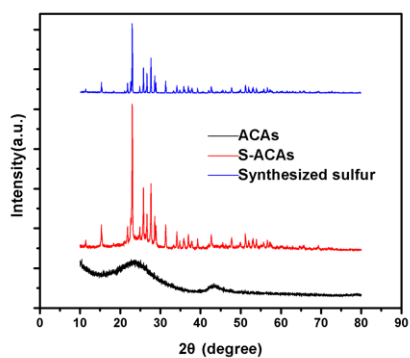

Fig. S4 XRD patterns of as-synthesized sulfur, ACAs and S-ACAs composites.

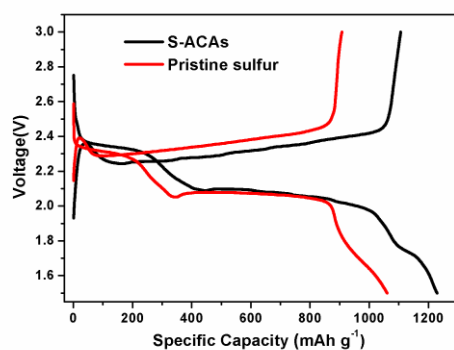

**Fig. S5** The initial discharge/charge voltage profiles of Li/S cells with the pristine sulfur cathode, S-ACAs composite cathode at 335 mA g<sup>-1</sup>.

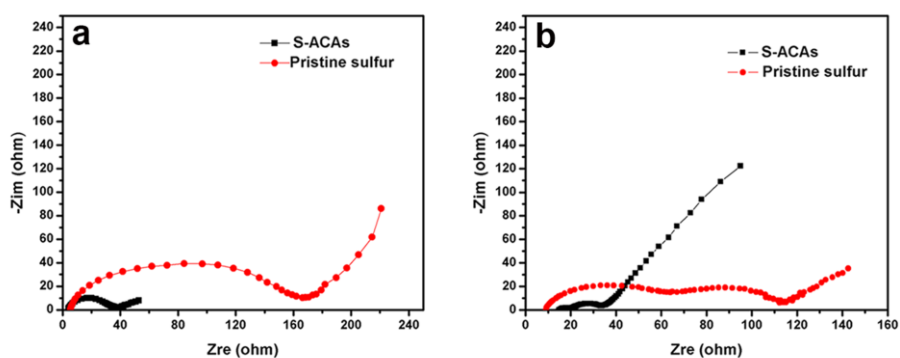

**Fig. S6** EIS of S-ACAs cathode and the pristine sulfur cathode (a) before the first discharge and (b) after 100 cycles.

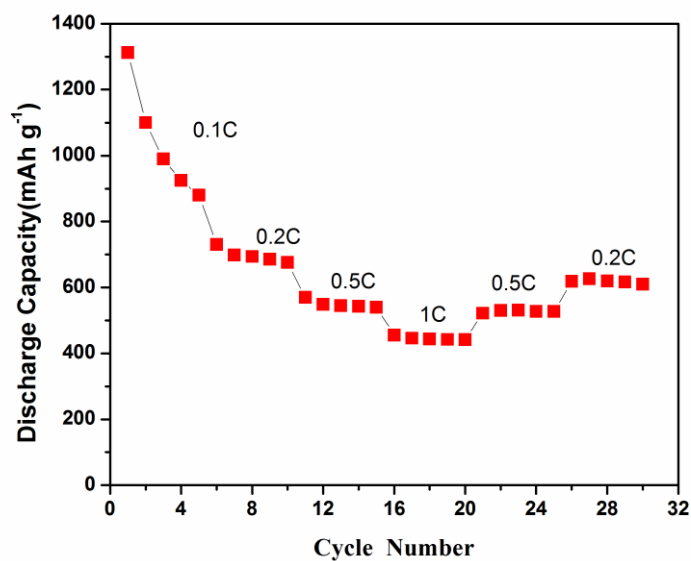

**Fig. S7** The rate capability of the S/activated carbon aerogel composite as the current rate increased from  
0.1C to 1 C
